# Supplementary material for: Integrative bioinformatics approaches for identifying potential biomarkers and pathways involved in non-obstructive azoospermia
Source: PubMed Central journal article supplement — Transl Androl Urol. 2021 Jan;10(1):243–57. doi: 10.21037/tau-20-1029 (PMC7844508; doi:10.21037/tau-20-1029), 2021-01
Supplement: tau-10-01-243-supplementary.pdf [file tau-10-01-243-supplementary.pdf]

**Table S1** Common DEGs of the GSE145467 and GSE108886 microarray profile datasets

| Common DEGs         | Gene names                                                                                                                                                                                                                                                                                                                                                                                                                                                                                                                                                                                                                                                                                                                                                                                                                                                                                                                                                                                                                                                                                                                                                                                                                                                                                                                                                                                                                                                                                                                                                                                                                                                                                                                                                                                                                                                                                                                                                                                                                                                                                                                                                                                                                                                                                                                                                                                                                                                                                                                                                                                                                                                                                                                                                                                                                                                                                                                                                                                                                                                                                                                                                                                                                                                                                                                                                                                                                                                                                                                                                                                                                                                                                                                                                                                                                                                                                                                                                                                                                                                                                                                                                                                                                                                                                                                                                                                                                                                                                                                                                                                                                                                                                                                                                                                                                                                                                                                                                                                                                                                                                                                                                                                                                                                                                                                                                                                                |
|---------------------|-----------------------------------------------------------------------------------------------------------------------------------------------------------------------------------------------------------------------------------------------------------------------------------------------------------------------------------------------------------------------------------------------------------------------------------------------------------------------------------------------------------------------------------------------------------------------------------------------------------------------------------------------------------------------------------------------------------------------------------------------------------------------------------------------------------------------------------------------------------------------------------------------------------------------------------------------------------------------------------------------------------------------------------------------------------------------------------------------------------------------------------------------------------------------------------------------------------------------------------------------------------------------------------------------------------------------------------------------------------------------------------------------------------------------------------------------------------------------------------------------------------------------------------------------------------------------------------------------------------------------------------------------------------------------------------------------------------------------------------------------------------------------------------------------------------------------------------------------------------------------------------------------------------------------------------------------------------------------------------------------------------------------------------------------------------------------------------------------------------------------------------------------------------------------------------------------------------------------------------------------------------------------------------------------------------------------------------------------------------------------------------------------------------------------------------------------------------------------------------------------------------------------------------------------------------------------------------------------------------------------------------------------------------------------------------------------------------------------------------------------------------------------------------------------------------------------------------------------------------------------------------------------------------------------------------------------------------------------------------------------------------------------------------------------------------------------------------------------------------------------------------------------------------------------------------------------------------------------------------------------------------------------------------------------------------------------------------------------------------------------------------------------------------------------------------------------------------------------------------------------------------------------------------------------------------------------------------------------------------------------------------------------------------------------------------------------------------------------------------------------------------------------------------------------------------------------------------------------------------------------------------------------------------------------------------------------------------------------------------------------------------------------------------------------------------------------------------------------------------------------------------------------------------------------------------------------------------------------------------------------------------------------------------------------------------------------------------------------------------------------------------------------------------------------------------------------------------------------------------------------------------------------------------------------------------------------------------------------------------------------------------------------------------------------------------------------------------------------------------------------------------------------------------------------------------------------------------------------------------------------------------------------------------------------------------------------------------------------------------------------------------------------------------------------------------------------------------------------------------------------------------------------------------------------------------------------------------------------------------------------------------------------------------------------------------------------------------------------------------------------------------------------------------|
| Upregulated (52)    | <i>IGF1 DPT LAMA2 LUM C1S ANXA1 DAB2 SERPINH1 SHC1 GPNMB S100A4 SEPP1 TSKU RARRES2 ADAMTS1 PLTP CRYAB IGDCC4 CPA3 CFH LAG3 MT1M GNG11 ZFP36L2 FTL SH3PXD2A PRRX1 APCDD1 SLFN11 ALDH1A3 NDRG2 PLPP3 GSN ANGPTL2 HLA-A HS6ST2 PDGFRA COL6A3 CTSK ABI3BP COL6A1 MGP SFRP4 DCN DLK1 IGFBP4 CAMK2N1 SFRP1 IGFBP5 CYP1B1 CKAP4 ARHGDI8</i>                                                                                                                                                                                                                                                                                                                                                                                                                                                                                                                                                                                                                                                                                                                                                                                                                                                                                                                                                                                                                                                                                                                                                                                                                                                                                                                                                                                                                                                                                                                                                                                                                                                                                                                                                                                                                                                                                                                                                                                                                                                                                                                                                                                                                                                                                                                                                                                                                                                                                                                                                                                                                                                                                                                                                                                                                                                                                                                                                                                                                                                                                                                                                                                                                                                                                                                                                                                                                                                                                                                                                                                                                                                                                                                                                                                                                                                                                                                                                                                                                                                                                                                                                                                                                                                                                                                                                                                                                                                                                                                                                                                                                                                                                                                                                                                                                                                                                                                                                                                                                                                                      |
| Downregulated (764) | <i>SPINK2 USP29 SAXO1 SAMD4A SPESP1 C4orf45 C9orf116 CARHSP1 CCDC116 INSL6 GAPDHS DNAJB8 C17orf97 MYBL1 NEK11 CCNA1 TESMIN PFKP MFS6L DIAPH3 HERPUD2 TTTY2 INTS7 FAM183A NUP155 ARMC3 REC114 OPLAH LRRC6 AMZ2 PACRG JARID2-AS1 SPACA5 MEX3B ZNF385D ODF2 DEPDC1B H2AFJ TGIF2LY DYRK3 LRRC71 C15orf48 SLC25A2 SLC2A5 IGF2BP3 DNAI1 CCDC110 IQCK COPRS TCP11 C4orf22 CCDC74B KDM4D CLGN FLJ35934 CALR3 ADGB IZUMO4 C17orf74 PGK2 CLHC1 NOL4 C16orf92 SPRR2C SKAP1 SESN3 DEPDC7 CABS1 CFAP36 RAB3IP SOCS7 NUP214 CMTM2 LYAR CCT8L2 ZSCAN5A NUP210L DNAH7 LINC00905 PIAS2 KRT72 TERB2 HIST1H2AA KIF2B MNS1 NUPR2 PRR30 ANKMY1 ARHGAP9 PCYT2 ACOT13 C9orf43 PPP1R2P9 FAM209A GK2 ARL4A EXD1 CCDC34 ST7L ADAM29 INPP4B CDCA3 LINC00919 MARCH10 TCP10L SPATA25 DPP10-AS3 CNBD2 YBX2 CDC14A UTRN ACTL7B ACSBG2 PPEF1 RNFT1 MAPK1 LYZL1 PRPS1L1 RMDN2 IQCF2 H1FNT KIAA1683 ATP1F1 ODF1 SPAG16 C10orf62 C3orf30 MEIG1 HMGB4 TSKS ZMYND15 RNF32 LYPLA1 PROK2 RPGRIP1 TEKT1 C20orf85 HSPA1L LYPD4 DNAJC5G C1orf158 CT83 C1orf101 TLL6 PCSK4 CFAP126 KLHDC3 CFAP206 DNAAF3 PPFIA2 PPP3R2 IZUMO1 RFPL3S SPATA17 IQCF1 CFAP61 SLC26A8 NUTM1 LDHAL6B BBOF1 CMTM1 CCNY LINC00608 FAM187B BOLL C11orf88 CFAP157 DFNB59 PIH1D2 TEX35 DRICH1 TMIGD3 TIAM2 CEP170 C17orf64 EFHB GLRX2 CCNB2 ZNF451 AKAP14 TRIM17 TPGS2 TBPL1 TEX40 UBQLN3 FGA ACTRT2 ULK4 PDXNL CNTRL CCDC65 LAMP3 DESI1 BANF2 LYZL4 ROPN1B FAM182B CFAP53 LRIT1 RFX3 GMCL1 SOHLH2 SCIN WDR87 FAM163A RNF148 ZDHHC20 PSMG1 CEP55 LEMD1 PDZD8 C11orf97 TNP2 FEM1B C12orf50 SLC36A3 SPZ1 ABHD2 TMEM99 TMC05A TTC39B MAEL PHYHIPL SEC14L1 FAM71E1 MLF1 NME8 LRRC37B ZBPB2 AKAP3 C4orf17 CCDC185 FSCN3 ANKAR SLC12A6 CAPN11 SPACA4 C9orf50 ADAM32 MPP6 FTMT LINC01096 NGLY1 TMC02 PAOX SLC9C1 DNAJC5B MBD3L1 KHDRBS3 SCP2D1 CCDC38 MRV1-AS1 C7orf62 C2orf57 KLK5 PLCZ1 PRSS58 EFHC1 KNSTRN PCM1 STAT4 DNAJB3 ZFAND4 FAM216A HCFC2 ACTL7A COIL BRDT TUBG1 TMEM217 SWT1 CDC25C FANCD2OS TTC21A TMEM38B C20orf144 C4orf47 FAM47B MROH7 COX7B2 FAM24A CCDC83 PIWIL1 LINC00221 LRRCC1 ACTL9 CCDC136 TSGA10 C1orf111 HINT3 IZUMO2 CATSPERG SPACA3 FSCB UBQLNL HABP4 RGS22 RALGPS2 C9orf131 LDHC RNF113B C6orf10 PDHA2 SPAM1 SGMS2 HYL51 PPP2R1B CAPZA3 SPANXA1 SLC22A16 TTC29 TEX37 FAM71E2 ZWILCH MCMDC2 OXCT2 LRWD1 ZBBX MCM4 BIRC8 SPEM1 IFT88 CCDC169 LARP1B SPA17 LYL1 C12orf10 SLC25A19 CAMK4 SPATA31C1 PROM1 HSPA4L KIF15 PDZD9 SPATA4 ALDH1A2 SHCBP1L GTSF1L HDAC11 DBF4 CXorf51B MTTP RNF133 CATSPER3 SLFNL1 DNAAF1 TCTE3 FAM221B TEKT3 CDR2 BPIFA3 C1orf105 EFCAB6 C10orf107 CCDC96 ADTRP SETD9 NFKBIB LCA5L PGR FAR2 CCDC173 GRK4 COX6B2 PRPH SPATA19 DLGAP5 TCTE1 C4orf36 FNDCC11 CFAP161 CTAGE15 OAZ3 BBS5 PHTF1 TKTL2 RSPH10B IRGC LINC00301 SPATS1 CYB5R2 BSCL2 ASAP2 CCDC138 SAMD15 TSSK4 FAM71F1 GOSR2 AZIN2 CAPSL UBTD2 GGN ZMYND12 BTBD16 LEF1 IQUB ATP23 C9orf24 DYNLL2 CCDC15 CABYR KSR1 C11orf63 TTC25 C2orf70 GTSF1 CETN1 TDRD10 C6orf201 CST13P AKIRIN1 ICA1 CTAGE6 PTTG3P CATSPER1 ST6GALNAC2 DYDC1 OSBP2 OSCP1 GSTO2 KRTDAP LRRFIP2 OR7E156P ANKRD13A DEUP1 CARNMT1 SYPL1 KLHL10 TSSK1B TTC23L MYCBPAP C1orf194 SEPT12 MYH3 RSPH1 ZNRF4 RAB11FIP5 TEX33 ROCK1P1 SH3GL3 TSACC ABCC12 PPFIA1 ELAVL2 HMMR MRPS15 PPP2R2B WISP3 CCDC54 TTC12 MPC2 ARRDC5 C1orf100 WBSR28 LRRC56 APH1B CFAP52 CCDC158 CFAP43 TMEM191B ACRBP CYB5R4 DRC7 ZCCHC13 GCNT3 C5orf46 FAM170A PPP2R3C SBSPON CAB39L PEX13 HSFY2 MORN3 ATP5S HEMGN GPR135 GRP C12orf56 ROPN1 C6orf99 CST8 CASC1 KYNU CPT1B LIN7A MS4A5 DCAF1 CCDC171 FAM205A STAMBPL1 LRR1 HOOK1 FABP12 TTC39C SPATA6 TSSK3 LRRC46 SPATA22 BEND7 PPM1G ZSCAN29 CDFN OR10J1 SPACA9 SPAG6 ERICH6 ZC2HC1C INPP1 PHOSPHO2 ARMC4 TSPAN16 CCDC42 RND2 TP53TG3 C17orf80 OLAH MROH2B C7orf34 CCDC187 FAM220A IQCF5 VRK3 SWI5 SMCP ZDHHC19 TCFL5 FAM71A SUN3 PRM2 LRRC34 TLL2 TDRD7 NDUFAF7 RNF151 C2orf42 NSUN7 PRSS37 TNKS CXorf65 ATP8B3 CLDND2 C12orf60 ITPRIPL1 ZNF689 PMS1 AGBL5 LINC00264 KLHL11 FAM181A EQTN STK33 TEX36-AS1 CPXCR1 WDR78 DDX25 C20orf141 AXDND1 PARD6A GKAP1 GPX4 TSGA13 SPATA9 TSSK6 SYNGR4 SPANXD FAM186B DAW1 LYZL2 NRAV TYMS SFT2D2 HSF5 DNAL1 TEX29 RNF168 TRIM69 TBC1D26 USP2 CSNK2A2 HRASLS5 C1orf94 IDE FAM209B TRIM42 DPY19L2 ALS2CR12 IQCD CCT6B DKKL1 OVOL2 SSUH2 ASB17 GEMIN4 ROPN1L CCDC89 GUC1A SLC9B1 NT5C1B DNAJC4 ASRGL1 TMPRSS12 PRM3 BBIP1 C10orf82 C11orf65 KLK12 TNP1 TRIM59 C2orf88 C1orf87 LYZL6 SPATA32 LKAAEAR1 SERP2 TSNAXIP1 PMFBP1 PGAM2 TYSND1 DEF6 C8orf88 ERICH3 CCIN ZNF233 ARMC12 HYPM TMEM225 LINC00635 MORC1 TUBB3 RIOK3 PPM1E ADSSL1 SLC6A16 TLL10 TEX26 COL25A1 MAST4 BPI NEDD1 CCER1 ANKRD55 MARCH11 SPERT LELP1 TMEM31 TIMD4 CCDC70 FBXO39 SPDYA APITD1 CRISP2 CERS3 HGFAC CCDC7 PLK4 PRM1 LINC00347 GPR18 MALL C22orf23 KLHDC9 BTG4 TTK FANK1 RSPH3 DRG1 PFN4 LRRC73 SIRPD SPACA7 CDKN3 CCDC178 SPATA8 MORN5 ZNF683 DYNLRB2 DNAI2 NUF2 PBK FAM92A1 CCDC112 PZP ZBTB32 C2orf16 USP44 ATL3 KPNA5 AKAP4 SNAP91 TMF1 EFCAB3 ZNF829 TRIM36 MAP3K19 FBXL13 C9orf135 ALS2CR11 ADAM2 SPATA16 ALKBH7 C11orf70 FAM104A HRASLS GLIPR1L1 ADCY10 FAM217A SPATA7 HIPK1 MDH1B TTC16 SI LRRC3B ZC3H14 PDE1A PTTG1 TPPP2 UBE2DNL NEK2 ASGR1 SIGLECL1 TPD52L3 MS4A6E CAPZB TROAP PSME4 IL7 ZMYND10 LRRC36 CCDC189 WDR66 FBXO15 MORC2-AS1 ZBPB MS4A14 PP2D1 EFCAB11 PROCA1 LINC00854 ZNF645 GALNTL5 XKR3 PPIL6 TTC26 STT3B SLC06A1 ADAD1 DNAH2 TMEM89 SRSF12 DPCD RFX2 CFAP45 ARMC2 TULP2 LINC01548 TBATA ABHD1 RPL39L SPATA24 WDR63 ZNF165 TP53TG5 FAM71C C12orf54</i> |

Common DEGs, common differentially expressed genes.
